# Supplementary material
Source: publisher figshare collection journal article supplement (https://gsajournals.figshare.com/ndownloader/files/27643626)
Supplement: Supplementary file 1 [file 27643626]

## Sheet: Sheet1
Supplementary file 4. Least significant difference (LSD) tests for the linearized infection type (LIT) scores observed on ND495 × Largo recombinant inbred lines and their parental lines tested with race TTTTF of Puccinia graminis f. sp. tritici.
Line	No. of replicates	TTTTF LIT Mean	TTTTF Std Dev	Difference from ND495	Difference from Largo
NL122	2	0	0	-2.5*	-5.0*
NL124	1	0	.	-2.5*	-5.0*
NL128	2	0	0	-2.5*	-5.0*
NL133	2	0	0	-2.5*	-5.0*
NL143	2	0	0	-2.5*	-5.0*
NL149	2	0	0	-2.5*	-5.0*
NL155	2	0	0	-2.5*	-5.0*
NL187	2	0	0	-2.5*	-5.0*
NL189	2	0	0	-2.5*	-5.0*
NL193	1	0	.	-2.5*	-5.0*
NL116	2	0.5	0.707107	-2.0*	-4.5*
NL146	2	0.5	0.707107	-2.0*	-4.5*
NL156	2	0.5	0.707107	-2.0*	-4.5*
NL157	2	0.5	0.707107	-2.0*	-4.5*
NL159	2	0.5	0.707107	-2.0*	-4.5*
NL204	2	0.5	0.707107	-2.0*	-4.5*
NL001	2	1	0	-1.5*	-4.0*
NL023	2	1	0	-1.5*	-4.0*
NL114	2	1	0	-1.5*	-4.0*
NL117	2	1	0	-1.5*	-4.0*
NL127	2	1	0	-1.5*	-4.0*
NL130	2	1	0	-1.5*	-4.0*
NL132	2	1	0	-1.5*	-4.0*
NL134	2	1	0	-1.5*	-4.0*
NL135	2	1	0	-1.5*	-4.0*
NL138	2	1	0	-1.5*	-4.0*
NL144	2	1	0	-1.5*	-4.0*
NL167	1	1	.	-1.5*	-4.0*
NL171	2	1	0	-1.5*	-4.0*
NL173	1	1	.	-1.5*	-4.0*
NL174	2	1	0	-1.5*	-4.0*
NL192	1	1	.	-1.5*	-4.0*
NL199	2	1	0	-1.5*	-4.0*
NL201	2	1	0	-1.5*	-4.0*
NL202	2	1	0	-1.5*	-4.0*
NL162	2	1.5	0.707107	-1	-3.5*
NL176	2	1.5	0.707107	-1	-3.5*
NL052	2	2	1.41421	-0.5	-3.0*
NL183	2	2	1.41421	-0.5	-3.0*
NL213	2	2	1.41421	-0.5	-3.0*
NL224	2	2	1.41421	-0.5	-3.0*
ND495	2	2.5	0.707107		-2.5*
NL139	2	2.5	2.12132	0	-2.5*
NL147	2	2.5	2.12132	0	-2.5*
NL180	2	2.5	2.12132	0	-2.5*
NL033	2	3	0	0.5	-2.0*
NL051	2	3	0	0.5	-2.0*
NL066	2	3	0	0.5	-2.0*
NL118	2	3	0	0.5	-2.0*
NL150	2	3	1.41421	0.5	-2.0*
NL166	2	3	0	0.5	-2.0*
NL181	2	3	0	0.5	-2.0*
NL044	2	3.5	0.707107	1	-1.5*
NL094	2	3.5	0.707107	1	-1.5*
NL232	2	3.5	0.707107	1	-1.5*
NL031	2	4	0	1.5*	-1
NL038	2	4	0	1.5*	-1
NL043	2	4	1.41421	1.5*	-1
NL048	2	4	0	1.5*	-1
NL053	2	4	0	1.5*	-1
NL057	1	4	.	1.5*	-1
NL085	2	4	0	1.5*	-1
NL109	2	4	0	1.5*	-1
NL112	2	4	0	1.5*	-1
NL121	2	4	0	1.5*	-1
NL136	2	4	0	1.5*	-1
NL161	2	4	0	1.5*	-1
NL168	1	4	.	1.5*	-1
NL233	2	4	0	1.5*	-1
NL011	2	4.5	3.53553	2.0*	-0.5
NL025	2	4.5	0.707107	2.0*	-0.5
NL029	2	4.5	0.707107	2.0*	-0.5
NL063	2	4.5	0.707107	2.0*	-0.5
NL080	2	4.5	0.707107	2.0*	-0.5
NL086	2	4.5	0.707107	2.0*	-0.5
NL097	2	4.5	0.707107	2.0*	-0.5
NL105	2	4.5	0.707107	2.0*	-0.5
NL123	2	4.5	0.707107	2.0*	-0.5
NL140	2	4.5	0.707107	2.0*	-0.5
NL141	2	4.5	0.707107	2.0*	-0.5
NL184	2	4.5	0.707107	2.0*	-0.5
NL215	2	4.5	0.707107	2.0*	-0.5
NL216	2	4.5	0.707107	2.0*	-0.5
NL218	2	4.5	0.707107	2.0*	-0.5
NL220	2	4.5	0.707107	2.0*	-0.5
NL230	2	4.5	0.707107	2.0*	-0.5
Largo	2	5	0	2.5*
NL002	1	5	.	2.5*	0
NL003	2	5	0	2.5*	0
NL006	2	5	0	2.5*	0
NL008	2	5	0	2.5*	0
NL009	2	5	0	2.5*	0
NL010	2	5	0	2.5*	0
NL013	2	5	0	2.5*	0
NL015	2	5	0	2.5*	0
NL019	2	5	0	2.5*	0
NL024	2	5	0	2.5*	0
NL027	2	5	0	2.5*	0
NL032	2	5	0	2.5*	0
NL036	2	5	0	2.5*	0
NL037	2	5	0	2.5*	0
NL041	2	5	0	2.5*	0
NL042	2	5	0	2.5*	0
NL046	2	5	0	2.5*	0
NL047	2	5	0	2.5*	0
NL049	2	5	0	2.5*	0
NL050	2	5	0	2.5*	0
NL058	2	5	0	2.5*	0
NL059	2	5	0	2.5*	0
NL060	2	5	0	2.5*	0
NL065	2	5	0	2.5*	0
NL067	2	5	0	2.5*	0
NL073	2	5	0	2.5*	0
NL074	2	5	0	2.5*	0
NL075	2	5	0	2.5*	0
NL078	2	5	0	2.5*	0
NL081	2	5	0	2.5*	0
NL083	1	5	.	2.5*	0
NL084	2	5	0	2.5*	0
NL087	2	5	0	2.5*	0
NL088	2	5	0	2.5*	0
NL089	2	5	0	2.5*	0
NL090	2	5	0	2.5*	0
NL095	2	5	0	2.5*	0
NL096	2	5	0	2.5*	0
NL098	2	5	0	2.5*	0
NL099	2	5	0	2.5*	0
NL100	2	5	0	2.5*	0
NL102	2	5	0	2.5*	0
NL103	2	5	0	2.5*	0
NL106	2	5	0	2.5*	0
NL107	2	5	0	2.5*	0
NL108	2	5	0	2.5*	0
NL110	2	5	0	2.5*	0
NL111	2	5	0	2.5*	0
NL113	2	5	0	2.5*	0
NL119	2	5	0	2.5*	0
NL125	2	5	0	2.5*	0
NL129	1	5	.	2.5*	0
NL137	2	5	0	2.5*	0
NL142	2	5	0	2.5*	0
NL151	2	5	0	2.5*	0
NL153	2	5	0	2.5*	0
NL164	2	5	0	2.5*	0
NL165	2	5	0	2.5*	0
NL169	2	5	1.41421	2.5*	0
NL170	2	5	0	2.5*	0
NL175	2	5	0	2.5*	0
NL178	2	5	0	2.5*	0
NL179	2	5	0	2.5*	0
NL182	2	5	0	2.5*	0
NL186	1	5	.	2.5*	0
NL190	2	5	0	2.5*	0
NL197	2	5	0	2.5*	0
NL200	2	5	0	2.5*	0
NL205	2	5	0	2.5*	0
NL207	2	5	0	2.5*	0
NL208	2	5	0	2.5*	0
NL210	2	5	0	2.5*	0
NL212	2	5	0	2.5*	0
NL214	2	5	0	2.5*	0
NL217	2	5	0	2.5*	0
NL219	1	5	.	2.5*	0
NL223	2	5	0	2.5*	0
NL225	2	5	0	2.5*	0
NL226	2	5	0	2.5*	0
NL228	2	5	0	2.5*	0
NL229	2	5	0	2.5*	0
NL017	2	5.5	0.707107	3.0*	0.5
NL026	2	5.5	0.707107	3.0*	0.5
NL030	2	5.5	0.707107	3.0*	0.5
NL040	2	5.5	0.707107	3.0*	0.5
NL070	2	5.5	0.707107	3.0*	0.5
NL091	2	5.5	0.707107	3.0*	0.5
NL101	2	5.5	0.707107	3.0*	0.5
NL120	2	5.5	0.707107	3.0*	0.5
NL148	2	5.5	0.707107	3.0*	0.5
NL154	2	5.5	0.707107	3.0*	0.5
NL206	2	5.5	0.707107	3.0*	0.5
NL007	2	6	1.41421	3.5*	1
NL191	2	6	0	3.5*	1
NL235	2	6	1.41421	3.5*	1
NL014	2	6.5	0.707107	4.0*	1.5*
NL158	2	6.5	0.707107	4.0*	1.5*
NL152	2	7	0	4.5*	2.0*
NL035	1	8	.	5.5*	3.0*
NL061	2	8	0	5.5*	3.0*
NL115	2	8	0	5.5*	3.0*
NL126	2	8	0	5.5*	3.0*
NL145	2	8	0	5.5*	3.0*
NL172	2	8	0	5.5*	3.0*
NL203	2	8	0	5.5*	3.0*
NL209	2	8	0	5.5*	3.0*
NL016	2	8.5	0.707107	6.0*	3.5*
NL020	2	8.5	0.707107	6.0*	3.5*
NL056	2	8.5	0.707107	6.0*	3.5*
NL077	2	8.5	0.707107	6.0*	3.5*
NL104	2	8.5	0.707107	6.0*	3.5*
NL177	2	8.5	0.707107	6.0*	3.5*
NL004	2	9	0	6.5*	4.0*
NL021	2	9	0	6.5*	4.0*
NL022	2	9	0	6.5*	4.0*
NL028	2	9	0	6.5*	4.0*
NL034	2	9	0	6.5*	4.0*
NL045	2	9	0	6.5*	4.0*
NL055	2	9	0	6.5*	4.0*
NL062	2	9	0	6.5*	4.0*
NL064	1	9	.	6.5*	4.0*
NL068	2	9	0	6.5*	4.0*
NL069	2	9	0	6.5*	4.0*
NL071	2	9	0	6.5*	4.0*
NL072	2	9	0	6.5*	4.0*
NL076	2	9	0	6.5*	4.0*
NL082	2	9	0	6.5*	4.0*
NL092	2	9	0	6.5*	4.0*
NL093	2	9	0	6.5*	4.0*
NL160	2	9	0	6.5*	4.0*
NL163	2	9	0	6.5*	4.0*
NL185	2	9	0	6.5*	4.0*
NL188	2	9	0	6.5*	4.0*
NL194	2	9	0	6.5*	4.0*
NL195	2	9	0	6.5*	4.0*
NL196	2	9	0	6.5*	4.0*
NL221	2	9	0	6.5*	4.0*
NL222	2	9	0	6.5*	4.0*
NL234	2	9	0	6.5*	4.0*
Critical t		1.97127
LSD (α = 0.05)		1.1488
* signifcantly different from parents at P < 0.05
